# Supplementary material for: Decoupling the Arrhenius equation via mechanochemistry
Source: PubMed Central journal article supplement (PMC5609516; doi:10.1039/c7sc00538e), 2017-05-30

# Decoupling the Arrhenius Equation via Mechanochemistry

Joel Andersen, James Mack

Department of Chemistry, University of Cincinnati, 301 Clifton Court, Cincinnati, Ohio 45221-0172, United states

## Supporting Information

### Table of Contents

|    |                                                |     |
|----|------------------------------------------------|-----|
| 1. | Reaction Procedure                             | S2  |
| 2. | Determination of Oscillation Frequency         | S2  |
| 3. | Vial Temperature Measurement and Control       | S3  |
| 4. | Hardened Vial Production                       | S5  |
| 5. | Computation Parameters and x, y, z Coordinates | S5  |
| 6. | Individually Plotted Data from Figure 3        | S14 |

## Reaction Procedure

**Typical Reaction Procedure (9-H + BQ example).** To a stainless steel vial, anthracene (0.0890 g, 0.500 mmol) and maleic anhydride (0.0490 g, 0.500 mmol) were added. A 3/16 inch stainless steel ball was then added. A Teflon o-ring was included to ensure proper seal between vial and cap. The vial was clamped in a Spex 8000M mixer/mill and reacted for three hours. All chemicals were purchased from Acros Organics except for 9,10-dimethylantracene, which was purchased from TCI Chemicals. All reactions were carried out with the same batch of chemicals.

**Analysis.** Reactions were first analyzed by removing a small sample directly from the vial for H NMR analysis. While convenient, it is also important because some of these reactions will proceed readily at the high concentrations and (potentially) elevated temperatures involved in rotatory evaporation. Considering the importance of obtaining accurate yields, such conditions must be avoided. Reactions producing 0% or 100% conversion by H-NMR were not analyzed further. Remaining reactions were analyzed by high-performance liquid chromatography (HPLC). First, vial contents were extracted with dichloromethane (DCM) and diluted further with DCM to 100 mL using a volumetric flask. After thorough mixing, 0.25 mL was removed using a disposable 1 mL syringe. This 0.25 mL sample was added to 5.00 mL of acetonitrile (ACN). This was thoroughly mixed and 1 mL was removed for HPLC analysis on an Agilent 1100 Series HPLC. All analyses were performed using a Phenomenex Synergy Hydro RP 150x4.6mm, 4 $\mu$  column. The reaction between BQ and 9,10-DMA was analyzed accordingly: flow rate 1.1 mL/min, injection volume 10  $\mu$ L, column temperature 21.5  $^{\circ}$ C, wavelength monitored 278 nm, solvent system 75% H<sub>2</sub>O, 25% ACN. The reaction of BQ with either 9-MA or 9-H was the same as above with the following modifications: wavelength monitored 210 nm, solvent system 32% H<sub>2</sub>O, 68% ACN. Calibration curves allowed back calculation of yield.

## Determination of Oscillation Frequency

Two key variables go into the oscillation frequency: the motor's operating frequency and pulley ratio connecting the motor to the shaft of the mill. The mill that we used (Spex 8000M Mixer/mill, <http://www.SPEX SamplePrep.com>) is by default a single oscillation-frequency mill. However, replacing the stock motor with a Marathon Y502 motor) and interfacing that motor with a Frenic Mini Inverter (Fuji Electric FRNF50C1S-6U) allows easy control of the motor's operating frequency. The mill's front metal lid was replaced with a homemade clear

plexiglass cover to allow direct observation of the milling process. From this observation, an accurate measure of the oscillation frequency was obtained using high-speed film. There was a strong linear correlation between the setting on the inverter's potentiometer and the operating frequency. For example, settings of 50, 60, and 70 Hz on the potentiometer produced oscillation frequencies of 14.5, 17.4, and 20.2 Hz. The ratio between the potentiometer setting and the oscillation frequency for these three settings are 3.45, 3.45, and 3.46, respectively. As a result, we could easily target a frequency (e.g., 16 Hz) by setting the potentiometer to the product of the frequency and 3.45.

### Vial Temperature Measurement and Control

The temperature of the vial was determined by use of a temperature logging "iButton" (DS1922E-F5#, Maxim Integrated Circuits, <http://www.ibutton.com>) clamped between the top of the vial and the clamp assembly. This temperature rises for approximately the first hour and then maintains for the remainder of the experiment. An example heating pattern with no external heating/cooling is provided in Supporting Figure 1. The reaction was cooled by forcing cold air over the entire mill. A Frigidaire window cooling unit (Model #LRAo87AT7) was coupled to the mill via flexible duct as shown in Supporting Figure 2. The temperature curve for this is presented in Supporting Figure 1. Minor fluctuations are inevitable due to the cooling unit, but for its intended purpose it worked quite well. To heat the vial, a thermal band (BB010004, <http://www.instrumentation-central.com>) was wrapped around an aluminum rod holding the vial. The aluminum rod was designed to encase the entire vial (and two iButtons) and also to have a snug fit with the thermal band. It was important to have it symmetrical to avoid uneven heating of the vial. The heating band, aluminum holder, and vial are all pictured in Supporting Figure 3. A typical heating trend is presented in Supporting Figure 4. The average of the top and bottom iButtons (once steady) was reported as the vial temperature. Temperatures were reproducible within approximately  $\pm 1$  °C.

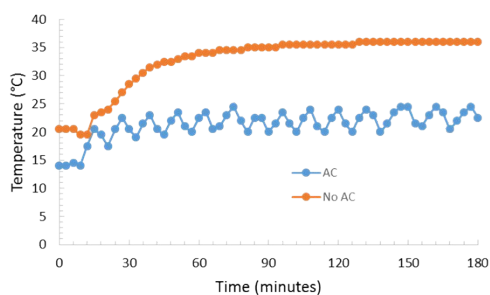

Supporting Figure 1. "AC" stands for air conditioning (of the mill).

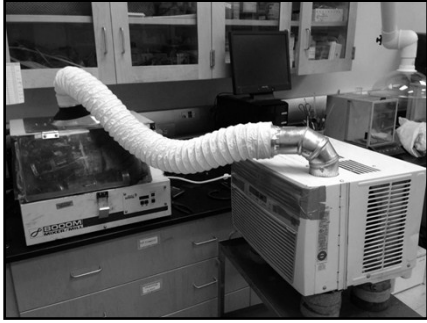

Supporting Figure 2.

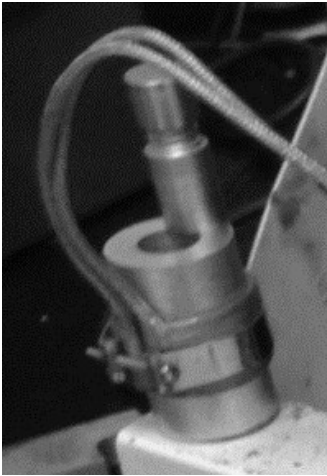

Supporting Figure 3.

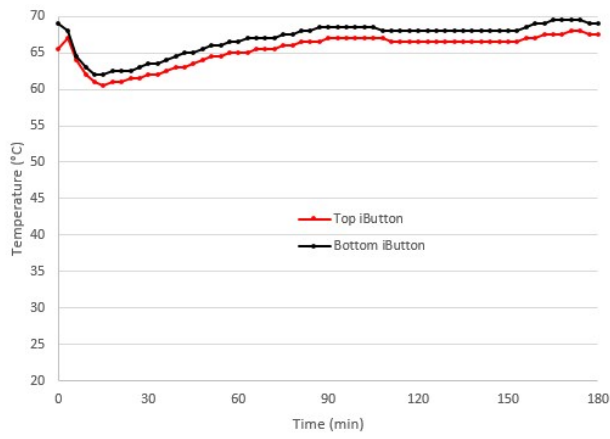

Supporting Figure 4.

## Hardened Vial Production

Prior to heat-treating, the raw stock material (S7 heat-treatable steel, rod, <https://www.mcmcaster.com>) was shaped using a metal lathe. Two vials were shaped, but one was left un-treated (to serve as control). The treated vial was heated in a programmable furnace (HT-22-D, Thermcraft) according to the specifications provided by the manufacturer to achieve the hardest vial possible after tempering at 400 °F. Three hardness measurements were averaged and the Rockwell C Hardness was determined to be C51 (control vial was Rockwell B Hardness B79). The reaction of BQ with 9,10-DMA were run in the control vial in triplicate, yielding 41.5% ( $\pm 1.4\%$ , standard error of the mean). When performed in a stainless steel vial we observed a yield of 41.2% ( $\pm 2.9\%$ ). This overlap suggests that stainless steel can be compared directly with the hardened vial despite potentially having minor differences in atomic make up. A schematic of the vial design is provided below. Teflon vials are made to the same dimensions, but no threads are included as they are too fragile.

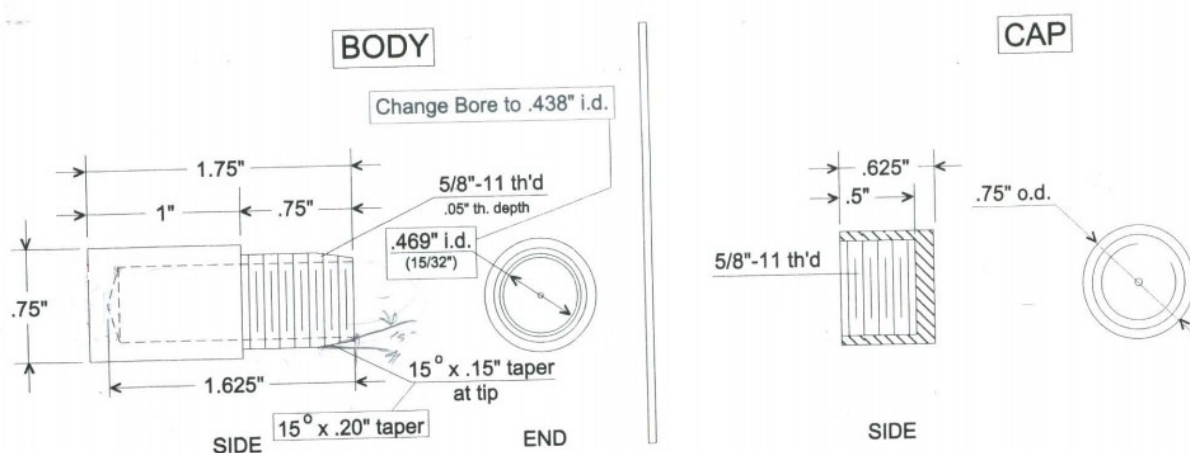

## Computation Parameters and x, y, z Coordinates

### Anthracene (9-H)

# opt mpw1pw91/6-31+g(d,p) geom=connectivity

| Center Number | Atomic Number | Atomic Type | Coordinates (Angstroms) |          |          |
|---------------|---------------|-------------|-------------------------|----------|----------|
|               |               |             | X                       | Y        | Z        |
| 1             | 1             | o           | -4.596457               | 1.244674 | 0.000002 |
| 2             | 6             | o           | -3.651564               | 0.711653 | 0.000001 |
| 3             | 1             | o           | -2.470498               | 2.489878 | 0.000000 |
| 4             | 6             | o           | -2.472592               | 1.404055 | 0.000000 |

|    |   |   |           |           |           |
|----|---|---|-----------|-----------|-----------|
| 5  | 6 | o | -2.472592 | -1.404055 | 0.000000  |
| 6  | 6 | o | -1.220360 | 0.719735  | -0.000001 |
| 7  | 6 | o | -3.651564 | -0.711653 | 0.000001  |
| 8  | 6 | o | -1.220360 | -0.719735 | -0.000001 |
| 9  | 6 | o | 0.000000  | 1.400763  | 0.000000  |
| 10 | 1 | o | -4.596457 | -1.244674 | 0.000002  |
| 11 | 1 | o | 0.000000  | -2.487454 | 0.000000  |
| 12 | 1 | o | -2.470498 | -2.489878 | 0.000000  |
| 13 | 6 | o | 1.220360  | 0.719735  | -0.000001 |
| 14 | 6 | o | 2.472592  | 1.404055  | 0.000000  |
| 15 | 6 | o | 1.220360  | -0.719735 | -0.000001 |
| 16 | 1 | o | 2.470498  | -2.489878 | 0.000000  |
| 17 | 6 | o | 0.000000  | -1.400763 | 0.000000  |
| 18 | 6 | o | 3.651564  | 0.711653  | 0.000001  |
| 19 | 1 | o | 2.470498  | 2.489878  | 0.000000  |
| 20 | 1 | o | 4.596457  | 1.244674  | 0.000002  |
| 21 | 6 | o | 3.651564  | -0.711653 | 0.000001  |
| 22 | 1 | o | 4.596457  | -1.244674 | 0.000002  |
| 23 | 6 | o | 2.472592  | -1.404055 | 0.000000  |
| 24 | 1 | o | 0.000000  | 2.487454  | 0.000000  |

---

### 9-methylanthracene (9-MA)

# opt mpw1pw91/6-31+g(d,p) geom=connectivity

Center Atomic Atomic Coordinates (Angstroms)  
Number Number Type X Y Z

|    |   |   |           |           |           |
|----|---|---|-----------|-----------|-----------|
| 1  | 1 | o | -4.573397 | -1.551486 | 0.000002  |
| 2  | 6 | o | -3.639355 | -0.999764 | 0.000001  |
| 3  | 1 | o | -2.415449 | -2.748608 | 0.000001  |
| 4  | 6 | o | -2.444579 | -1.663092 | 0.000000  |
| 5  | 6 | o | -2.490533 | 1.134337  | -0.000002 |
| 6  | 6 | o | -1.207024 | -0.953681 | 0.000000  |
| 7  | 6 | o | -3.658554 | 0.420253  | 0.000000  |
| 8  | 6 | o | -1.217418 | 0.484650  | -0.000001 |
| 9  | 6 | o | 0.013223  | -1.628672 | 0.000000  |
| 10 | 1 | o | -4.609707 | 0.942379  | 0.000000  |
| 11 | 1 | o | -2.536432 | 2.216534  | -0.000003 |
| 12 | 6 | o | 1.222627  | -0.936766 | 0.000000  |
| 13 | 6 | o | 2.464039  | -1.641777 | 0.000001  |
| 14 | 6 | o | 1.223875  | 0.506994  | -0.000002 |
| 15 | 1 | o | 2.555995  | 2.234857  | 0.000000  |
| 16 | 6 | o | -0.002731 | 1.206711  | -0.000002 |
| 17 | 6 | o | 3.656533  | -0.977321 | 0.000000  |
| 18 | 1 | o | 2.436331  | -2.727316 | 0.000002  |
| 19 | 1 | o | 4.592304  | -1.526003 | 0.000000  |
| 20 | 6 | o | 3.669324  | 0.443221  | 0.000000  |
| 21 | 1 | o | 4.618041  | 0.969690  | -0.000001 |
| 22 | 6 | o | 2.500767  | 1.154042  | 0.000000  |
| 23 | 1 | o | 0.021797  | -2.715192 | 0.000002  |
| 24 | 6 | o | -0.061288 | 2.711169  | 0.000002  |
| 25 | 1 | o | -0.592452 | 3.084206  | -0.881495 |
| 26 | 1 | o | 0.921946  | 3.174913  | -0.000016 |

27 1 0 -0.592418 3.084201 0.881523

### 9,10-dimethylantracene (9,10-DMA)

# opt mpw1pw91/6-31+g(d,p) geom=connectivity

| Center<br>Number | Atomic<br>Number | Atomic<br>Type | Coordinates (Angstroms) |           |           |
|------------------|------------------|----------------|-------------------------|-----------|-----------|
|                  |                  |                | X                       | Y         | Z         |
| 1                | 1                | o              | -1.251762               | 4.595731  | -0.161954 |
| 2                | 6                | o              | -1.243005               | 3.512429  | -0.103103 |
| 3                | 1                | o              | 0.866192                | 3.409154  | -0.061499 |
| 4                | 6                | o              | -0.054461               | 2.840314  | -0.039045 |
| 5                | 6                | o              | -2.455336               | 1.428861  | -0.038939 |
| 6                | 6                | o              | 0.006799                | 1.412589  | 0.026172  |
| 7                | 6                | o              | -2.464610               | 2.794254  | -0.103048 |
| 8                | 6                | o              | -1.237609               | 0.680994  | 0.026194  |
| 9                | 6                | o              | 1.237609                | 0.727602  | 0.073842  |
| 10               | 1                | o              | -3.406930               | 3.328720  | -0.161873 |
| 11               | 1                | o              | -3.400110               | 0.901051  | -0.061318 |
| 12               | 6                | o              | 1.237609                | -0.680994 | 0.026194  |
| 13               | 6                | o              | 2.455336                | -1.428861 | -0.038939 |
| 14               | 6                | o              | -0.006799               | -1.412589 | 0.026172  |
| 15               | 1                | o              | -0.866192               | -3.409154 | -0.061499 |
| 16               | 6                | o              | -1.237609               | -0.727602 | 0.073842  |
| 17               | 6                | o              | 2.464610                | -2.794254 | -0.103048 |
| 18               | 1                | o              | 3.400110                | -0.901051 | -0.061318 |
| 19               | 1                | o              | 3.406930                | -3.328720 | -0.161873 |
| 20               | 6                | o              | 1.243005                | -3.512429 | -0.103103 |
| 21               | 1                | o              | 1.251762                | -4.595731 | -0.161954 |
| 22               | 6                | o              | 0.054461                | -2.840314 | -0.039045 |
| 23               | 6                | o              | 2.534638                | 1.490148  | 0.146726  |
| 24               | 1                | o              | 2.929659                | 1.722310  | -0.849288 |
| 25               | 1                | o              | 3.301244                | 0.929494  | 0.681620  |
| 26               | 1                | o              | 2.417530                | 2.432686  | 0.681531  |
| 27               | 6                | o              | -2.534638               | -1.490148 | 0.146726  |
| 28               | 1                | o              | -2.929659               | -1.722310 | -0.849288 |
| 29               | 1                | o              | -3.301244               | -0.929494 | 0.681620  |
| 30               | 1                | o              | -2.417530               | -2.432686 | 0.681531  |

### Maleic Anhydride (MA)

# opt 6-31+g(d,p) geom=connectivity mpw1pw91

| Center<br>Number | Atomic<br>Number | Atomic<br>Type | Coordinates (Angstroms) |          |           |
|------------------|------------------|----------------|-------------------------|----------|-----------|
|                  |                  |                | X                       | Y        | Z         |
| 1                | 6                | o              | 0.000000                | 0.666557 | -1.255434 |
| 2                | 1                | o              | 0.000000                | 1.361049 | -2.083332 |

|   |   |   |          |           |           |
|---|---|---|----------|-----------|-----------|
| 3 | 6 | o | 0.000000 | -0.666557 | -1.255434 |
| 4 | 1 | o | 0.000000 | -1.361049 | -2.083332 |
| 5 | 6 | o | 0.000000 | -1.123218 | 0.158723  |
| 6 | 6 | o | 0.000000 | 1.123218  | 0.158723  |
| 7 | 8 | o | 0.000000 | 0.000000  | 0.965451  |
| 8 | 8 | o | 0.000000 | -2.233326 | 0.600224  |
| 9 | 8 | o | 0.000000 | 2.233326  | 0.600224  |

---

### Benzoquinone (BQ)

# opt mpw1pw91/6-31+g(d,p) geom=connectivity

| Center Number | Atomic Number | Atomic Type | Coordinates (Angstroms) |           |           |
|---------------|---------------|-------------|-------------------------|-----------|-----------|
|               |               |             | X                       | Y         | Z         |
| 1             | 6             | o           | 0.000000                | 0.000000  | 1.438510  |
| 2             | 6             | o           | 0.000000                | 1.266839  | 0.670336  |
| 3             | 1             | o           | 0.000000                | 2.179571  | 1.256987  |
| 4             | 6             | o           | 0.000000                | 1.266839  | -0.670336 |
| 5             | 1             | o           | 0.000000                | 2.179571  | -1.256987 |
| 6             | 6             | o           | 0.000000                | 0.000000  | -1.438510 |
| 7             | 6             | o           | 0.000000                | -1.266839 | -0.670336 |
| 8             | 1             | o           | 0.000000                | -2.179571 | -1.256987 |
| 9             | 6             | o           | 0.000000                | -1.266839 | 0.670336  |
| 10            | 1             | o           | 0.000000                | -2.179571 | 1.256987  |
| 11            | 8             | o           | 0.000000                | 0.000000  | 2.659716  |
| 12            | 8             | o           | 0.000000                | 0.000000  | -2.659716 |

---

### 9-H + BQ

# opt=(calcf,ts) freq mpw1pw91/6-31+g(d,p) geom=connectivity

| Center Number | Atomic Number | Atomic Type | Coordinates (Angstroms) |          |           |
|---------------|---------------|-------------|-------------------------|----------|-----------|
|               |               |             | X                       | Y        | Z         |
| 1             | 6             | o           | 2.536055                | 2.427571 | -0.712344 |
| 2             | 1             | o           | 3.338862                | 2.919594 | -1.251033 |
| 3             | 6             | o           | 2.536089                | 2.432068 | 0.696798  |
| 4             | 1             | o           | 3.338919                | 2.927525 | 1.232297  |
| 5             | 6             | o           | 1.526938                | 1.805665 | 1.397569  |
| 6             | 1             | o           | 1.532638                | 1.793271 | 2.482873  |
| 7             | 6             | o           | 0.459146                | 1.194783 | 0.705050  |
| 8             | 6             | o           | 0.459088                | 1.190292 | -0.712585 |
| 9             | 6             | o           | 1.526853                | 1.796738 | -1.409048 |
| 10            | 1             | o           | 1.532464                | 1.777464 | -2.494252 |
| 11            | 6             | o           | -0.600738               | 0.474601 | -1.353905 |



|    |   |   |           |           |           |
|----|---|---|-----------|-----------|-----------|
| 12 | 1 | o | -0.563775 | 0.366512  | -2.434957 |
| 13 | 6 | o | -1.878406 | 0.406932  | -0.709470 |
| 14 | 6 | o | -1.878320 | 0.411359  | 0.707097  |
| 15 | 6 | o | -0.600545 | 0.482950  | 1.350940  |
| 16 | 1 | o | -0.563543 | 0.381832  | 2.432667  |
| 17 | 6 | o | -3.092315 | 0.237598  | 1.401860  |
| 18 | 1 | o | -3.088198 | 0.226890  | 2.487426  |
| 19 | 6 | o | -4.275506 | 0.102675  | 0.704337  |
| 20 | 1 | o | -5.211489 | -0.005105 | 1.241818  |
| 21 | 6 | o | -4.275594 | 0.098284  | -0.704493 |
| 22 | 1 | o | -5.211644 | -0.012850 | -1.241175 |
| 23 | 6 | o | -3.092494 | 0.228858  | -1.402992 |
| 24 | 1 | o | -3.088505 | 0.211373  | -2.488469 |
| 25 | 6 | o | 0.000674  | -1.574775 | -0.698519 |
| 26 | 1 | o | -0.840668 | -2.002344 | -1.231848 |
| 27 | 6 | o | 0.001077  | -1.569936 | 0.709071  |
| 28 | 1 | o | -0.839740 | -1.994345 | 1.245753  |
| 29 | 6 | o | 1.274794  | -1.612107 | -1.443220 |
| 30 | 6 | o | 2.517646  | -1.394911 | -0.666887 |
| 31 | 1 | o | 3.426605  | -1.279311 | -1.248375 |
| 32 | 6 | o | 2.518087  | -1.390377 | 0.674600  |
| 33 | 1 | o | 3.427419  | -1.270842 | 1.254705  |
| 34 | 6 | o | 1.275740  | -1.602259 | 1.453183  |
| 35 | 8 | o | 1.322976  | -1.816282 | -2.650409 |
| 36 | 8 | o | 1.324654  | -1.798184 | 2.661699  |

### 9-H + MA (TS)

# opt=(calcf,ts) freq mpw1pw91/6-31+g(d,p) geom=connectivity

| Center Number | Atomic Number | Atomic Type | Coordinates (Angstroms) |          |           |
|---------------|---------------|-------------|-------------------------|----------|-----------|
|               |               |             | X                       | Y        | Z         |
| 1             | 6             | o           | -2.701500               | 2.229069 | -0.704880 |
| 2             | 1             | o           | -3.535772               | 2.668247 | -1.240799 |
| 3             | 6             | o           | -2.701500               | 2.229157 | 0.704635  |
| 4             | 1             | o           | -3.535774               | 2.668400 | 1.240499  |
| 5             | 6             | o           | -1.659688               | 1.660671 | 1.404687  |
| 6             | 1             | o           | -1.670006               | 1.635515 | 2.489214  |
| 7             | 6             | o           | -0.561562               | 1.110723 | 0.709474  |
| 8             | 6             | o           | -0.561566               | 1.110626 | -0.709578 |
| 9             | 6             | o           | 0.525902                | 0.444133 | 1.354130  |
| 10            | 1             | o           | 0.492701                | 0.348457 | 2.436624  |
| 11            | 6             | o           | 1.803841                | 0.405592 | 0.708563  |
| 12            | 6             | o           | 1.803836                | 0.405499 | -0.708602 |
| 13            | 6             | o           | 3.022449                | 0.259309 | 1.402391  |
| 14            | 1             | o           | 3.019750                | 0.248744 | 2.488031  |
| 15            | 6             | o           | 4.207944                | 0.153135 | 0.704552  |
| 16            | 1             | o           | 5.146450                | 0.066639 | 1.241405  |
| 17            | 6             | o           | 4.207939                | 0.153043 | -0.704573 |
| 18            | 6             | o           | -1.659690               | 1.660489 | -1.404860 |
| 19            | 1             | o           | -1.670010               | 1.635187 | -2.489383 |

|    |   |   |           |           |           |
|----|---|---|-----------|-----------|-----------|
| 20 | 1 | o | 5.146442  | 0.066478  | -1.241420 |
| 21 | 6 | o | 0.525885  | 0.443940  | -1.354159 |
| 22 | 1 | o | 0.492670  | 0.348131  | -2.436640 |
| 23 | 6 | o | 3.022439  | 0.259124  | -1.402419 |
| 24 | 1 | o | 3.019733  | 0.248419  | -2.488057 |
| 25 | 6 | o | 0.012841  | -1.637243 | -0.698787 |
| 26 | 1 | o | 0.781419  | -2.046659 | -1.337650 |
| 27 | 6 | o | 0.012823  | -1.637167 | 0.698983  |
| 28 | 1 | o | 0.781388  | -2.046494 | 1.337919  |
| 29 | 6 | o | -1.397769 | -1.684203 | 1.130666  |
| 30 | 6 | o | -1.397746 | -1.684326 | -1.130496 |
| 31 | 8 | o | -2.196899 | -1.602327 | 0.000071  |
| 32 | 8 | o | -1.870217 | -1.769378 | 2.229880  |
| 33 | 8 | o | -1.870166 | -1.769606 | -2.229714 |

g-MA + BQ (TS) (Note: Cartesian keyword required for successful completion)

# opt=(calcf,ts,cartesian) mpw1pw91/6-31+g(d,p) geom=connectivity

| Center Number | Atomic Number | Atomic Type | Coordinates (Angstroms) |           |           |
|---------------|---------------|-------------|-------------------------|-----------|-----------|
|               |               |             | X                       | Y         | Z         |
| 1             | 6             | o           | 2.531896                | -0.110979 | 2.576716  |
| 2             | 1             | o           | 3.341088                | 0.211922  | 3.222888  |
| 3             | 6             | o           | 2.453690                | -1.455608 | 2.168628  |
| 4             | 1             | o           | 3.203414                | -2.164257 | 2.504313  |
| 5             | 6             | o           | 1.431797                | -1.881326 | 1.345798  |
| 6             | 1             | o           | 1.389302                | -2.919475 | 1.037841  |
| 7             | 6             | o           | 0.421030                | -0.982118 | 0.931980  |
| 8             | 6             | o           | 0.508891                | 0.372459  | 1.342839  |
| 9             | 6             | o           | 1.584919                | 0.795595  | 2.149575  |
| 10            | 1             | o           | 1.645671                | 1.838805  | 2.443445  |
| 11            | 6             | o           | -0.474004               | 1.275690  | 0.820572  |
| 12            | 1             | o           | -0.381722               | 2.327120  | 1.081621  |
| 13            | 6             | o           | -1.793006               | 0.759670  | 0.588621  |
| 14            | 6             | o           | -1.893682               | -0.595127 | 0.184781  |
| 15            | 6             | o           | -0.675626               | -1.362344 | 0.078718  |
| 16            | 6             | o           | -3.170507               | -1.109346 | -0.134779 |
| 17            | 1             | o           | -3.278147               | -2.145566 | -0.432177 |
| 18            | 6             | o           | -4.293738               | -0.312546 | -0.039919 |
| 19            | 1             | o           | -5.269523               | -0.730259 | -0.263620 |
| 20            | 6             | o           | -4.182704               | 1.035634  | 0.345035  |
| 21            | 1             | o           | -5.070984               | 1.654522  | 0.411515  |
| 22            | 6             | o           | -2.944091               | 1.567800  | 0.640436  |
| 23            | 1             | o           | -2.846929               | 2.609011  | 0.932381  |
| 24            | 6             | o           | 0.107874                | 1.348482  | -1.204585 |
| 25            | 1             | o           | -0.692272               | 2.038109  | -1.452150 |
| 26            | 6             | o           | 0.067649                | 0.045020  | -1.736981 |
| 27            | 1             | o           | -0.801761               | -0.293463 | -2.287703 |
| 28            | 6             | o           | 1.417315                | 2.017936  | -0.993421 |
| 29            | 6             | o           | 2.625482                | 1.168429  | -1.050761 |
| 30            | 1             | o           | 3.554049                | 1.634831  | -0.738005 |
| 31            | 6             | o           | 2.568220                | -0.092020 | -1.505651 |
| 32            | 1             | o           | 3.450135                | -0.719344 | -1.587453 |

|    |   |   |           |           |           |
|----|---|---|-----------|-----------|-----------|
| 33 | 6 | o | 1.302408  | -0.691277 | -1.995483 |
| 34 | 8 | o | 1.501016  | 3.218009  | -0.767382 |
| 35 | 8 | o | 1.329319  | -1.758462 | -2.607707 |
| 36 | 6 | o | -0.713475 | -2.743352 | -0.498693 |
| 37 | 1 | o | 0.247534  | -3.015410 | -0.938845 |
| 38 | 1 | o | -1.457016 | -2.827370 | -1.291016 |
| 39 | 1 | o | -0.957551 | -3.479579 | 0.277109  |

---

### 9-MA + MA (TS)

# opt=(calcf,ts) freq mpw1pw91/6-31+g(d,p) geom=connectivity

| Center<br>Number | Atomic<br>Number | Atomic<br>Type | Coordinates (Angstroms) |           |           |
|------------------|------------------|----------------|-------------------------|-----------|-----------|
|                  |                  |                | X                       | Y         | Z         |
| 1                | 6                | o              | 2.654819                | 1.453243  | -1.883528 |
| 2                | 1                | o              | 3.449866                | 2.150954  | -2.123027 |
| 3                | 6                | o              | 2.715451                | 0.133505  | -2.369402 |
| 4                | 1                | o              | 3.557567                | -0.180043 | -2.976462 |
| 5                | 6                | o              | 1.715168                | -0.762798 | -2.063265 |
| 6                | 1                | o              | 1.765426                | -1.788767 | -2.412330 |
| 7                | 6                | o              | 0.606145                | -0.351750 | -1.295514 |
| 8                | 6                | o              | 0.542005                | 0.976050  | -0.797061 |
| 9                | 6                | o              | 1.601254                | 1.863861  | -1.095684 |
| 10               | 1                | o              | 1.579160                | 2.878483  | -0.717252 |
| 11               | 6                | o              | -0.428712               | -1.251370 | -0.888886 |
| 12               | 1                | o              | -0.353341               | -2.286192 | -1.213667 |
| 13               | 6                | o              | -1.735032               | -0.713519 | -0.649428 |
| 14               | 6                | o              | -1.808163               | 0.613732  | -0.154679 |
| 15               | 6                | o              | -0.571111               | 1.329203  | 0.044638  |
| 16               | 6                | o              | -2.908933               | -1.480879 | -0.780971 |
| 17               | 1                | o              | -2.836145               | -2.501207 | -1.145112 |
| 18               | 6                | o              | -4.137545               | -0.933409 | -0.475144 |
| 19               | 1                | o              | -5.041548               | -1.518766 | -0.603820 |
| 20               | 6                | o              | -4.219417               | 0.388362  | 0.000123  |
| 21               | 1                | o              | -5.188121               | 0.818785  | 0.230202  |
| 22               | 6                | o              | -3.076801               | 1.142388  | 0.173861  |
| 23               | 1                | o              | -3.161408               | 2.159152  | 0.538806  |
| 24               | 6                | o              | 0.028740                | -0.179474 | 1.777636  |
| 25               | 1                | o              | -0.771195               | 0.236312  | 2.370702  |
| 26               | 6                | o              | 0.073608                | -1.447641 | 1.192647  |
| 27               | 1                | o              | -0.653142               | -2.234371 | 1.338466  |
| 28               | 6                | o              | 1.506843                | -1.805658 | 1.070305  |
| 29               | 6                | o              | 1.410817                | 0.266754  | 1.966309  |
| 30               | 8                | o              | 2.256454                | -0.706845 | 1.437896  |
| 31               | 8                | o              | 2.015703                | -2.831528 | 0.712474  |
| 32               | 8                | o              | 1.852878                | 1.266340  | 2.466510  |
| 33               | 6                | o              | -0.573928               | 2.661123  | 0.734247  |
| 34               | 1                | o              | -0.772157               | 3.468780  | 0.019465  |
| 35               | 1                | o              | 0.389769                | 2.853711  | 1.209445  |
| 36               | 1                | o              | -1.336269               | 2.709097  | 1.512319  |

---

9,10-DMA + BQ (TS)

# opt=(calcf,ts) freq mpwipw91/6-31+g(d,p) geom=connectivity

| Center<br>Number | Atomic<br>Number | Atomic<br>Type | Coordinates (Angstroms) |           |           |
|------------------|------------------|----------------|-------------------------|-----------|-----------|
|                  |                  |                | X                       | Y         | Z         |
| 1                | 6                | o              | 2.457637                | 0.702101  | 2.559493  |
| 2                | 1                | o              | 3.216983                | 1.244672  | 3.112522  |
| 3                | 6                | o              | 2.457654                | -0.702552 | 2.559355  |
| 4                | 1                | o              | 3.217016                | -1.245212 | 3.112276  |
| 5                | 6                | o              | 1.492494                | -1.394899 | 1.858155  |
| 6                | 1                | o              | 1.503764                | -2.478221 | 1.864142  |
| 7                | 6                | o              | 0.469965                | -0.709674 | 1.164984  |
| 8                | 6                | o              | 0.469951                | 0.709446  | 1.165117  |
| 9                | 6                | o              | 1.492462                | 1.394561  | 1.858425  |
| 10               | 1                | o              | 1.503703                | 2.477881  | 1.864627  |
| 11               | 6                | o              | -0.551191               | 1.391982  | 0.404657  |
| 12               | 6                | o              | -1.822362               | 0.708329  | 0.291116  |
| 13               | 6                | o              | -1.822349               | -0.708445 | 0.290986  |
| 14               | 6                | o              | -0.551159               | -1.392092 | 0.404388  |
| 15               | 6                | o              | -3.044850               | -1.393325 | 0.132276  |
| 16               | 1                | o              | -3.060146               | -2.476319 | 0.137257  |
| 17               | 6                | o              | -4.233036               | -0.701619 | 0.003603  |
| 18               | 1                | o              | -5.167055               | -1.244935 | -0.091541 |
| 19               | 6                | o              | -4.233047               | 0.701520  | 0.003726  |
| 20               | 1                | o              | -5.167074               | 1.244838  | -0.091324 |
| 21               | 6                | o              | -3.044873               | 1.393220  | 0.132525  |
| 22               | 1                | o              | -3.060180               | 2.476214  | 0.137694  |
| 23               | 6                | o              | 0.128399                | 0.706154  | -1.619880 |
| 24               | 1                | o              | -0.700964               | 1.235445  | -2.075577 |
| 25               | 6                | o              | 0.128483                | -0.705947 | -1.619955 |
| 26               | 1                | o              | -0.700789               | -1.235284 | -2.075766 |
| 27               | 6                | o              | 1.406330                | 1.436450  | -1.652450 |
| 28               | 6                | o              | 2.634751                | 0.670575  | -1.343155 |
| 29               | 1                | o              | 3.535442                | 1.254643  | -1.184052 |
| 30               | 6                | o              | 2.634838                | -0.670064 | -1.343212 |
| 31               | 1                | o              | 3.535603                | -1.254031 | -1.184157 |
| 32               | 6                | o              | 1.406518                | -1.436072 | -1.652574 |
| 33               | 8                | o              | 1.476484                | 2.630374  | -1.929577 |
| 34               | 8                | o              | 1.476830                | -2.629964 | -1.929799 |
| 35               | 6                | o              | -0.530736               | -2.891553 | 0.326582  |
| 36               | 1                | o              | 0.469036                | -3.276746 | 0.129456  |
| 37               | 1                | o              | -1.168082               | -3.258159 | -0.478462 |
| 38               | 1                | o              | -0.887478               | -3.324776 | 1.268816  |
| 39               | 6                | o              | -0.530801               | 2.891455  | 0.327098  |
| 40               | 1                | o              | 0.468982                | 3.276717  | 0.130174  |
| 41               | 1                | o              | -0.887689               | 3.324514  | 1.269353  |
| 42               | 1                | o              | -1.168048               | 3.258169  | -0.477975 |

9,10-DMA + MA (TS)

# opt=(calcf,ts) mpw1pw91/6-31+g(d,p) geom=connectivity

---

| Center<br>Number | Atomic<br>Number | Atomic<br>Type | Coordinates (Angstroms) |           |           |
|------------------|------------------|----------------|-------------------------|-----------|-----------|
|                  |                  |                | X                       | Y         | Z         |
| 1                | 6                | o              | -2.647207               | 0.702725  | 2.330858  |
| 2                | 1                | o              | -3.446845               | 1.244057  | 2.824564  |
| 3                | 6                | o              | -2.647340               | -0.702534 | 2.330687  |
| 4                | 1                | o              | -3.447084               | -1.243834 | 2.824257  |
| 5                | 6                | o              | -1.639288               | -1.396347 | 1.697089  |
| 6                | 1                | o              | -1.657136               | -2.479207 | 1.693777  |
| 7                | 6                | o              | -0.573374               | -0.710547 | 1.073273  |
| 8                | 6                | o              | -0.573233               | 0.710608  | 1.073446  |
| 9                | 6                | o              | -1.639020               | 1.396484  | 1.697432  |
| 10               | 1                | o              | -1.656629               | 2.479350  | 1.694404  |
| 11               | 6                | o              | 0.483180                | -1.392565 | 0.368646  |
| 12               | 6                | o              | 1.754579                | -0.709912 | 0.305979  |
| 13               | 6                | o              | 1.754719                | 0.709711  | 0.306193  |
| 14               | 6                | o              | 0.483527                | 1.392613  | 0.369234  |
| 15               | 6                | o              | 2.983232                | -1.394230 | 0.187159  |
| 16               | 1                | o              | 2.998715                | -2.477359 | 0.195777  |
| 17               | 6                | o              | 4.174016                | -0.702463 | 0.099780  |
| 18               | 1                | o              | 5.111222                | -1.245117 | 0.038512  |
| 19               | 6                | o              | 4.174159                | 0.701863  | 0.099986  |
| 20               | 1                | o              | 5.111475                | 1.244345  | 0.038880  |
| 21               | 6                | o              | 2.983517                | 1.393836  | 0.187576  |
| 22               | 1                | o              | 2.999207                | 2.476961  | 0.196539  |
| 23               | 6                | o              | -0.098669               | 0.698349  | -1.700989 |
| 24               | 1                | o              | 0.661505                | 1.337193  | -2.125627 |
| 25               | 6                | o              | -0.098970               | -0.698763 | -1.700525 |
| 26               | 1                | o              | 0.660672                | -1.338068 | -2.125458 |
| 27               | 6                | o              | -1.507835               | -1.128182 | -1.705967 |
| 28               | 6                | o              | -1.507189               | 1.128499  | -1.706578 |
| 29               | 8                | o              | -2.304446               | 0.000353  | -1.594767 |
| 30               | 8                | o              | -1.987932               | -2.227072 | -1.783758 |
| 31               | 8                | o              | -1.986802               | 2.227568  | -1.784903 |
| 32               | 6                | o              | 0.434690                | 2.888836  | 0.243015  |
| 33               | 1                | o              | 0.668047                | 3.366510  | 1.201775  |
| 34               | 1                | o              | -0.552844               | 3.223489  | -0.077266 |
| 35               | 1                | o              | 1.151495                | 3.251907  | -0.494491 |
| 36               | 6                | o              | 0.434235                | -2.888833 | 0.242551  |
| 37               | 1                | o              | -0.553363               | -3.223474 | -0.077546 |
| 38               | 1                | o              | 0.667733                | -3.366439 | 1.201305  |
| 39               | 1                | o              | 1.150895                | -3.252000 | -0.495054 |

---

### Individually Plotted Data From Figure 3

Because some of the data in Figure 3 overlaps, we have included figures here in which each line is plotted individually.

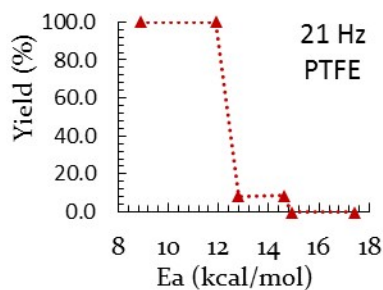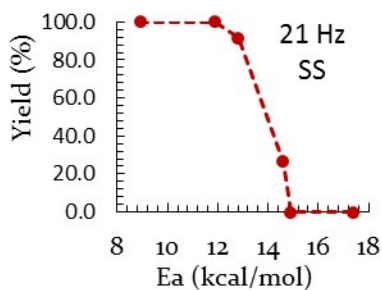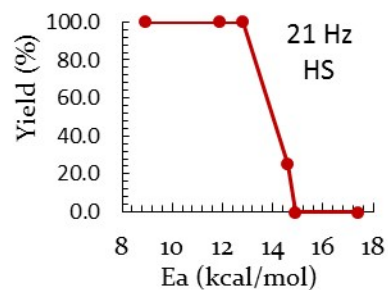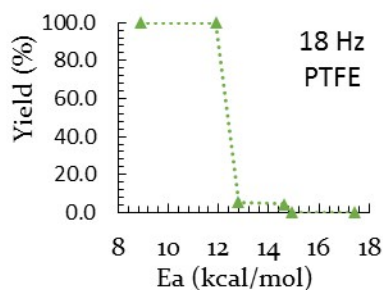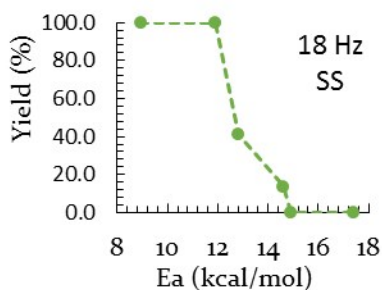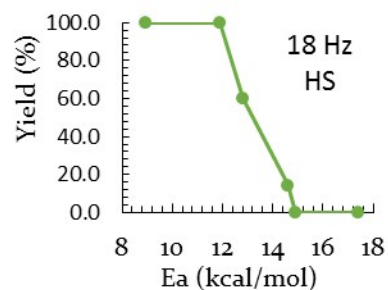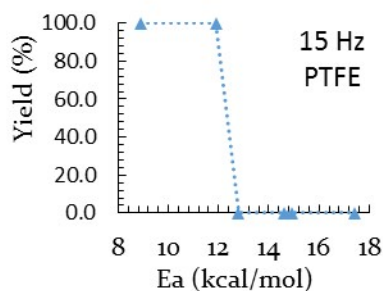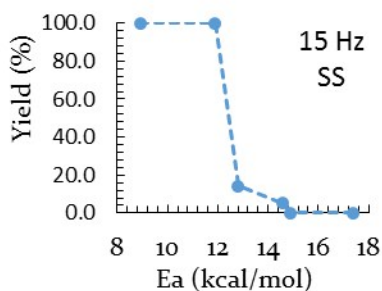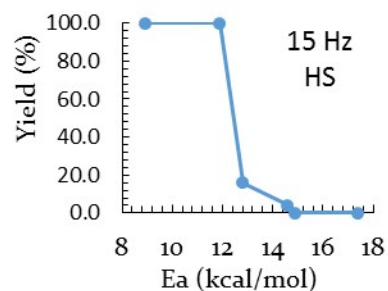

Supplement: SC-008-C7SC00538E-s001.pdf [file SC-008-C7SC00538E-s001.pdf]
